# Supplementary material for: Reconstructing ecosystem functions of the active microbial community of the Baltic Sea oxygen depleted sediments
Source: PubMed Central journal article supplement (PMC4730985; doi:10.7717/peerj.1593), 2016-01-19

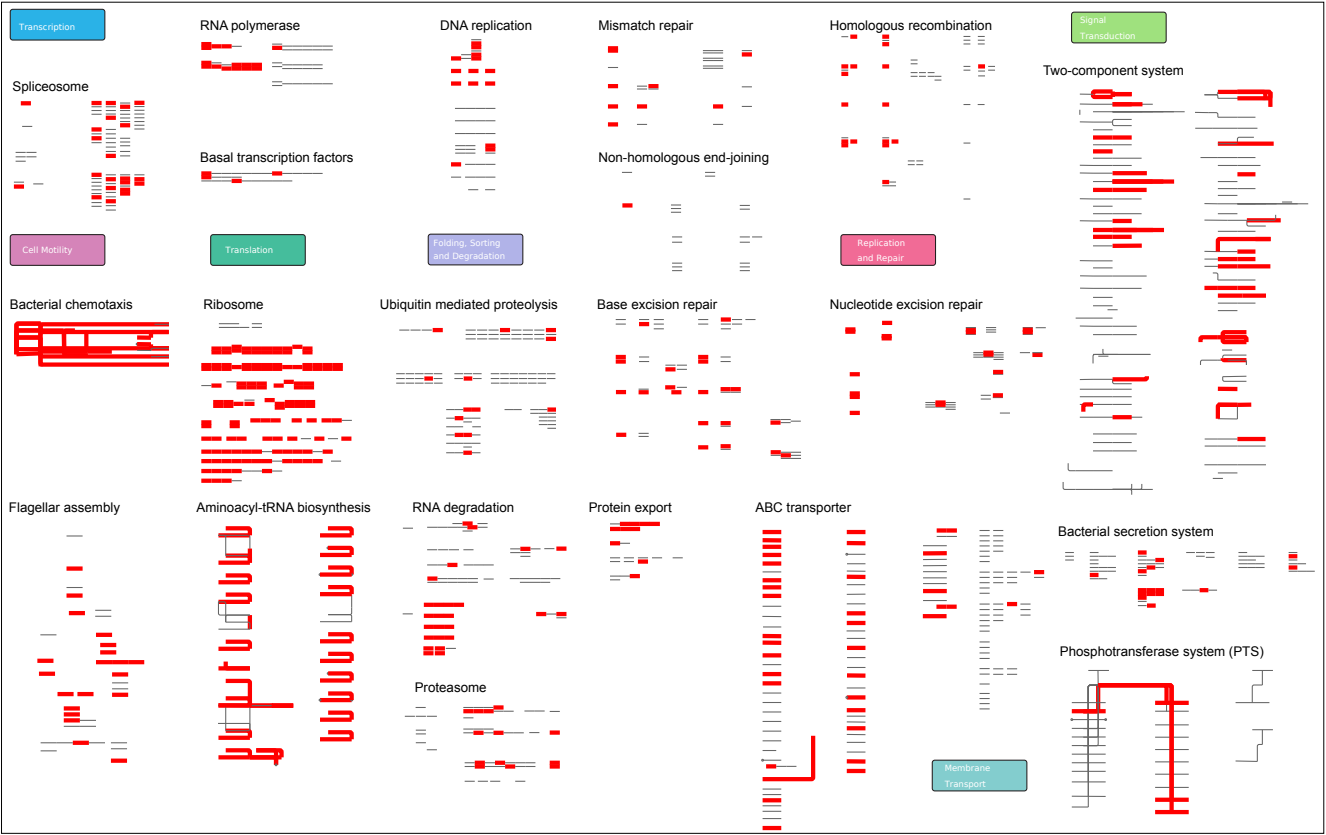

Supplement: peerj-04-1593-s001.pdf [file peerj-04-1593-s001.pdf]
