# Supplementary material for: Reconstructing ecosystem functions of the active microbial community of the Baltic Sea oxygen depleted sediments
Source: PeerJ. 2016 Jan 19;4:e1593. doi: 10.7717/peerj.1593 (PMC4730985; doi:10.7717/peerj.1593)
Supplement: Table S2 — Environmental parameters determined at Station BY31, Landsort Deep, in the Baltic Sea on the 21st of April 2010, concurrently with sampling of the sediment for metagenomic and metatranscriptomic analyses. [file peerj-04-1593-s009.xlsx]

## Sheet: SMHI_BY31__LANDSORTSDJ_2014-02-
Water depth (m)	Temperature (°C)	Salinity (psu)	pH	Dissolved oxygen (mL/L)	Hydrogen sulfide (μmol/L)	Phosphate (μmol/L)	Total phosphorous (μmol/L)	Nitrate (μmol/L)	Ammonium* (μmol/L)	Total nitrogen (μmol/L)	Alkanity	Silica (μmol/L)	Chlorofyll a (μg/L)	DOC (mg/L)	Total C %	Total N %	Total P %	C/N	C/P	N/P
0	2.21	6.192	NaN	10.77	NaN	0.16	0.7	0.02	0.06	20.76	1.555	6.6	3.54
5	2.22	6.267	NaN	NaN	NaN	0.15	0.7	0.02	0.05	20.99	1.554	6.5	3.77
10	2.21	6.267	NaN	NaN	NaN	0.15	0.76	0.02	0.05	21.62	1.554	6.5	3.89	4.2
15	2.2	6.273	NaN	NaN	NaN	0.15	0.73	0.02	0.05	21.13	1.556	6.5	3.79
20	2.17	6.35	NaN	10.84	NaN	0.15	0.6	0.02	0.08	19.51	1.565	6.3	2.01
25	1.82	6.567	NaN	NaN	NaN	0.19	0.61	0.04	0.1	19.29	1.584	7	NaN
30	0.79	6.726	NaN	NaN	NaN	0.54	0.85	3.26	0.1	21.31	1.613	13.1	2.15
40	0.82	6.856	NaN	9.33	NaN	0.63	0.87	4.23	0.07	21.42	1.623	14.6	0.87
50	3.21	7.315	NaN	NaN	NaN	0.95	1.18	4.42	0.06	21.13	1.645	18.4	1.1
60	4.81	8.384	NaN	3.77	NaN	1.98	2.19	5.17	0.16	20.81	1.697	32.7	0.6
70	5.16	9.332	7.1	1.27	NaN	2.97	3.15	4.91	0.49	19.93	1.741	46.6	NaN	3.6
80	5.41	9.868	NaN	0.63	NaN	2.98	3.31	0.65	3.88	18.69	1.764	51.4	0.33
90	5.49	10.059	NaN	-0.19	4.4	3.61	3.86	0.02	6.07	20.08	1.788	53.3	NaN
100	5.6	10.253	NaN	-0.44	10	3.74	3.94	0.02	6.15	20.83	1.796	54.9	NaN
125	5.73	10.439	NaN	-0.65	14.7	3.78	3.99	0.02	6.69	21.05	1.801	55.7	NaN
150	5.76	10.533	NaN	-0.87	19.4	3.85	4.07	0.02	6.03	21.72	1.804	57.1	NaN
175	5.85	10.633	NaN	-0.93	20.9	3.85	4.22	0.02	6.05	23.66	1.807	57.3	NaN
200	5.89	10.658	NaN	-0.89	20	3.77	4.01	0.02	6.26	21.72	1.808	56.8	NaN
250	6	10.752	NaN	-0.75	16.9	3.57	3.94	0.02	6.63	21.16	1.809	55.8	NaN
300	6.05	10.783	NaN	-0.65	14.7	3.59	3.85	0.02	6.5	20.75	1.808	55.2	NaN
400	6.07	10.794	7.07	-0.74	16.6	3.62	3.86	0.02	6.27	20.83	1.809	55.4	0.5	8.8
440	6.08	10.798	NaN	-0.73	16.3	3.62	3.88	0.02	6.49	21.39	1.809	55.6	NaN
Sediment	5.8	10.6	7.67			46.8913		4.10677	363.847			268.236		79	9.14	0.8	0.14	11.5	65.23	5.68
									*water measurements from 2010-05-10
