# Supplementary material for: Reconstructing ecosystem functions of the active microbial community of the Baltic Sea oxygen depleted sediments
Source: PeerJ. 2016 Jan 19;4:e1593. doi: 10.7717/peerj.1593 (PMC4730985; doi:10.7717/peerj.1593)
Supplement: Table S3 — The number of functions within SEED categories (level 1) that were present (≥1 hit) in the Landsort Deep sediment metatranscriptome and metagenome, respectively. The SEED categories are sorted from top to bottom based on high to low portion of functions expressed (i.e., number of functions in metatranscriptome/number of functions in the metagenome). [file peerj-04-1593-s010.xlsx]

## Sheet: Sheet1
SEED level 1	Number of functions in RNA	Number of functions in DNA	Number of functions in RNA / Number of functions in DNA (%)
Protein Metabolism	253	438	57.7626
Cell Division and Cell Cycle	34	64	53.125
Motility and Chemotaxis	46	89	51.6854
Nucleosides and Nucleotides	78	173	45.0867
Potassium Metabolism	15	35	42.8571
Clustering-based subsystems	378	894	42.2819
Fatty Acids, Lipids and Isoprenoids	77	191	40.3141
RNA Metabolism	130	337	38.5757
Miscellaneous	245	640	38.2812
DNA Metabolism	88	230	38.2609
Cofactors, Vitamins, Prosthetic Groups, Pigments	178	466	38.1974
Amino Acids and Derivatives	205	542	37.8229
Respiration	167	453	36.8653
Photosynthesis	22	66	33.3333
Nitrogen Metabolism	36	109	33.0275
Stress Response	84	255	32.9412
Sulfur Metabolism	34	104	32.6923
Secondary Metabolism	12	37	32.4324
Carbohydrates	304	1000	30.4
Membrane Transport	111	398	27.8894
Cell Wall and Capsule	104	386	26.943
Phages, Prophages, Transposable elements, Plasmids	49	200	24.5
Virulence, Disease and Defense	57	250	22.8
Regulation and Cell signalling	48	220	21.8182
Dormancy and Sporulation	12	58	20.6897
Metabolism of Aromatic Compounds	28	151	18.543
Iron acquisition and metabolism	21	123	17.0732
